# Supplementary material for: Water promoted 9-fluorenylmethyloxycarbonyl detachment from amino acids in charged microdroplets
Source: Royal Society of Chemistry journal article supplement (doi:10.1039/d2ob01438f), 2022-01-01
Supplement: d2ob01438f1.pdf [file d2ob01438f1.pdf]

## Supporting Information

### **Water promoted 9-fluorenylmethyloxycarbonyl detachment from amino acid in charged microdroplets**

Xiao-Fei Gao\*, Jin-Cai Cheng, Chun-Lian Ye, Shan Xiao, Zai-Ming Qiu, Xinglei Zhang\*

*Jiangxi Key Laboratory for Mass Spectrometry and Instrumentation, East China  
University of Technology, Nanchang 330013, China*

#### **Corresponding authors:**

Dr. Xiao-Fei Gao, E-mail: [sandy20025327@126.com](mailto:sandy20025327@126.com), Prof. Xinglei Zhang,  
leizi8586@126.com. Tel: (+86)791-8389-6370, Fax: (+86)791-8389-6370.

## Table of Contents

|                                                                                                                                                                                                                    |     |
|--------------------------------------------------------------------------------------------------------------------------------------------------------------------------------------------------------------------|-----|
| Chemical and reagents .....                                                                                                                                                                                        | S3  |
| Experimental setups .....                                                                                                                                                                                          | S3  |
| Computational details .....                                                                                                                                                                                        | S4  |
| Figure S1. Mass spectrometric analysis of Fmoc elimination reaction in microdroplets of $\mathbf{P_f}$ .....                                                                                                       | S5  |
| Figure S2. Mass spectrometric analysis of Fmoc elimination reaction in microdroplets of $\mathbf{G_f}$ with different distance .....                                                                               | S6  |
| Figure S3. Mass spectrometric analysis of Fmoc elimination reaction in microdroplets of $\mathbf{P_f}$ with different distance .....                                                                               | S7  |
| Figure S4. Mass spectrometric analysis of Fmoc elimination reaction in deuterated microdroplets of $\mathbf{P_f}$ .....                                                                                            | S8  |
| Figure S5. Mass spectrometric analysis of Fmoc elimination reaction in microdroplets of $\mathbf{A_f}$ .....                                                                                                       | S9  |
| Figure S6. Mass spectrometric analysis of Fmoc elimination reaction in microdroplets of $\mathbf{V_f}$ .....                                                                                                       | S10 |
| Figure S7. Mass spectrometric analysis of Fmoc elimination reaction in microdroplets of $\mathbf{L_f}$ .....                                                                                                       | S11 |
| Figure S8. Mass spectrometric analysis of Fmoc elimination reaction in microdroplets of $\mathbf{I_f}$ .....                                                                                                       | S12 |
| Figure S9. Mass spectrometric analysis of Fmoc elimination reaction in microdroplets of $\mathbf{M_f}$ .....                                                                                                       | S13 |
| Figure S10. Mass spectrometric analysis of Fmoc elimination reaction in microdroplets of $\mathbf{F_f}$ .....                                                                                                      | S14 |
| Figure S11. Mass spectrometric analysis of Fmoc elimination reaction in microdroplets of $\mathbf{K_f}$ .....                                                                                                      | S15 |
| Figure S12. Mass spectrometric analysis of Fmoc elimination reaction in microdroplets of $\mathbf{R_f}$ .....                                                                                                      | S16 |
| Figure S13. Mass spectrometric analysis of Fmoc elimination reaction in microdroplets of $\mathbf{GG_f}$ .....                                                                                                     | S17 |
| Table S1 Relative proportion of $[\mathbf{X_f} - \mathbf{H}]^-$ and $[\mathbf{X_c} - \mathbf{H}]^-$ after microdroplet reaction recorded by mass spectrometer, comparing with base peaks in the mass spectra ..... | S18 |
| Cartesian coordinates, solution-phase Gibbs free energies and solution-phase enthalpies of intermediates and transition states .....                                                                               | S20 |
| References .....                                                                                                                                                                                                   | S25 |

### ***Chemicals and reagents***

All chemical reagents were obtained from commercial suppliers and then directly used without further purification. Fmoc-Gly-OH ( $\geq 98\%$ ), Fmoc-Ala-OH ( $\geq 98\%$ ), Fmoc-Val-OH ( $\geq 98\%$ ), Fmoc-Leu-OH ( $\geq 98\%$ ), Fmoc-Ile-OH ( $\geq 98\%$ ), Fmoc-Pro-OH ( $\geq 98\%$ ), Fmoc-Met-OH ( $\geq 98\%$ ), Fmoc-Phe-OH ( $\geq 98\%$ ), Fmoc-Gly-Gly-OH ( $\geq 98\%$ ), Fmoc-Lys-OH ( $\geq 98\%$ ), Fmoc-Arg-OH ( $\geq 98\%$ ) and D<sub>2</sub>O (99.9%) were purchased from Sun Chemical Technology (Shanghai) Co., LTD. HPLC grade methanol and acetonitrile solvent from Fisher Scientific (Nepean, ON, Canada) were used for all experiments. Deionized water was provided by the chemistry facilities in the East China Institute of Technology.

### ***Experimental setup***

All MS spectra were recorded in negative ion mode using a commercial linear ion trap mass spectrometer (LTQ-XL, ThermoFisher, San Jose, CA, USA). The mass spectrometer was coupled with a home-made n-ESI emitter (schematically shown in Figure 1a) for microdroplet generation and online analysis. The emitters were constructed from borosilicate glass capillaries (1.2 mm O.D., 0.9 mm I.D., World Precision Instruments Co.), that were pulled to a tip ( $\sim 20\ \mu\text{m}$ , I.D.) using a Flaming/Brown micropipette puller (Sutter Instrument Co. model-1000, Novato, CA, U. S. A.). Xcalibur<sup>®</sup> software was used for LTQ instrument control and data processing.

The aqueous solution of the reactant without adding external catalysts or base was sprayed by the home-made n-ESI emitter, whose output was directed toward the

mass spectrometer inlet. All mass spectra were recorded for product analysis at -4.5 kV. Mass spectra were collected over an average time for 60 s in the  $m/z$  range of 50-500 at the centroid mode for each sample replicate. The temperature of the ion transfer capillary was 150 °C, the capillary voltage was -50.0 V, and the tube lens voltage was -150.0 V. Other parameters were default values recommended by the instrument manufacturer. Collision-induced dissociation (CID) experiments were performed on mass-selected ions for molecular structure identification using a collision energy (CE) in the range 0~30%, as indicated. The window width in MS/MS experiments for ions was 1.0 Da.

### **Computational Details**

All calculations have been performed using the DFT method implemented in the commercial Gaussian 16<sup>[1]</sup> program package. Molecular geometries of the model complexes were optimized applying the PBE0-D3BJ<sup>[2-3]</sup> functional and Def2SVP<sup>[4]</sup> basis set were used to describe all the atoms. As soon as the convergences of optimizations were obtained, the frequency calculations at the same level have been performed to identify all the stationary points as minima or transition states, which has the unique imaginary frequencies. The intrinsic reaction coordinate (IRC)<sup>[5]</sup> calculations have been carried out to confirm that the transition structures can indeed connect the related reactant and product. The optimized geometries mentioned were built by Gaussview 6.0<sup>[6]</sup>.

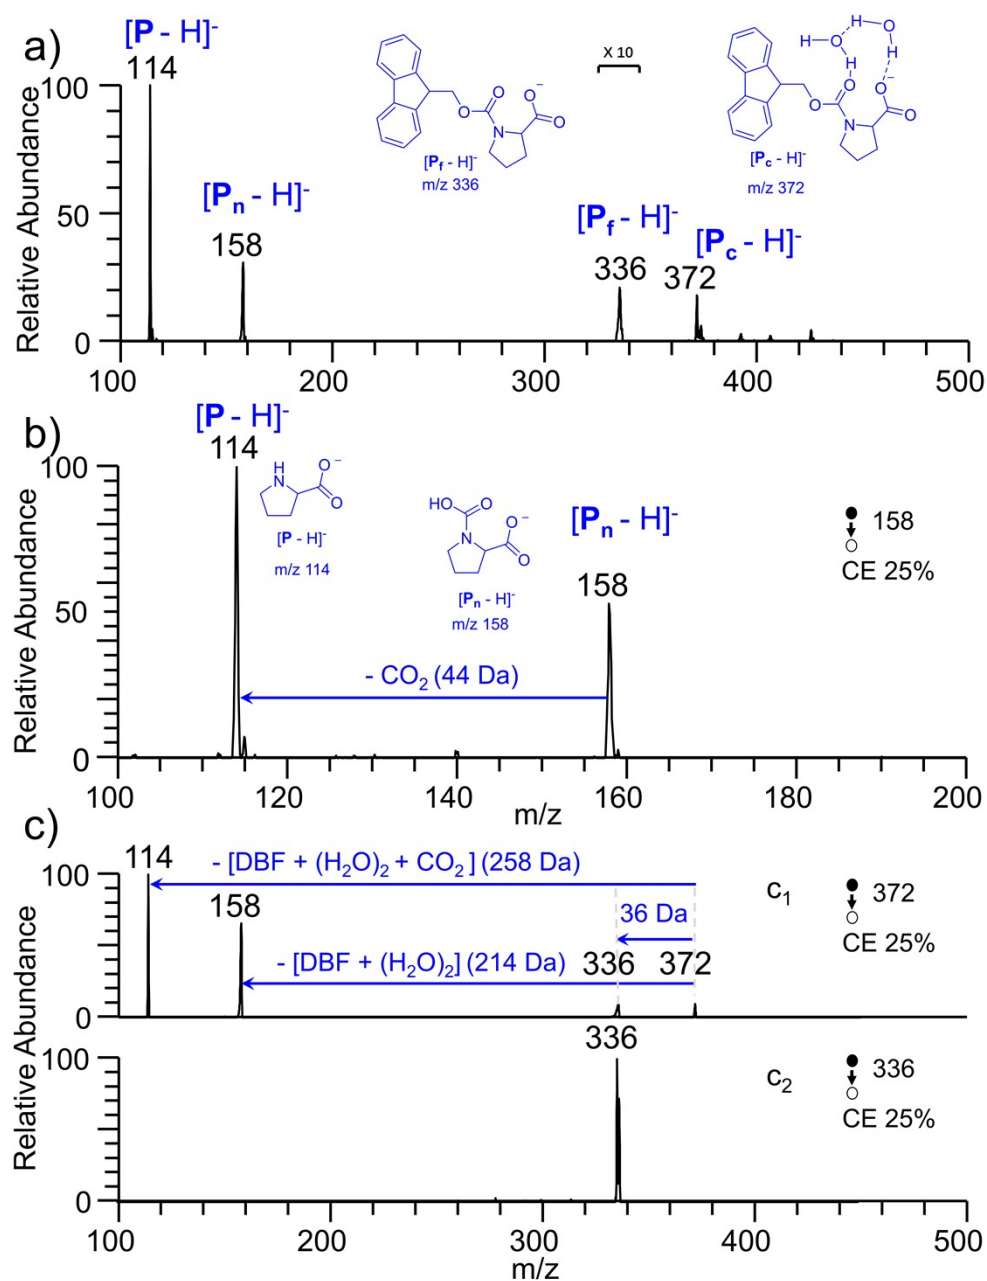

**Figure S1. Mass spectrometric analysis of Fmoc elimination reaction in microdroplets of  $P_f$ .** Online mass spectrum of Fmoc deprotection reaction of  $P_f$  in microdroplets (a). MS/MS spectra of ions of m/z 158 (b), m/z 372 ( $c_1$ ), m/z 336 ( $c_2$ ).

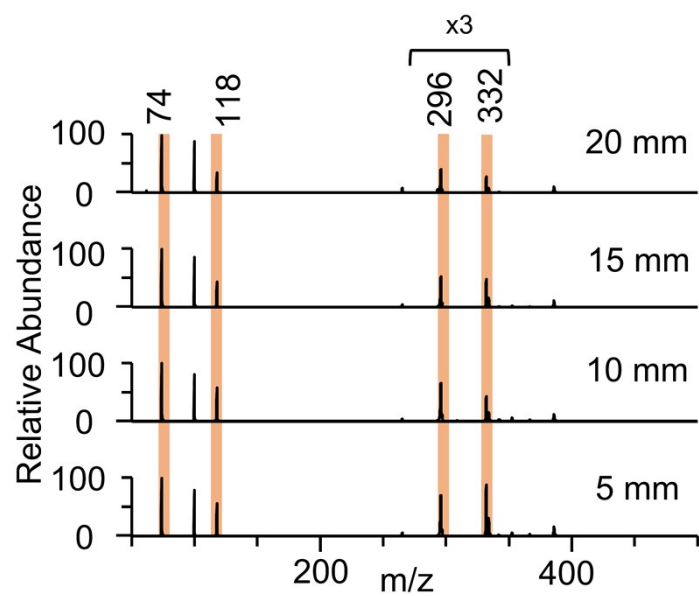

**Figure S2 Mass spectrometric analysis of Fmoc elimination reaction in microdroplets of  $G_f$  with different distance.**

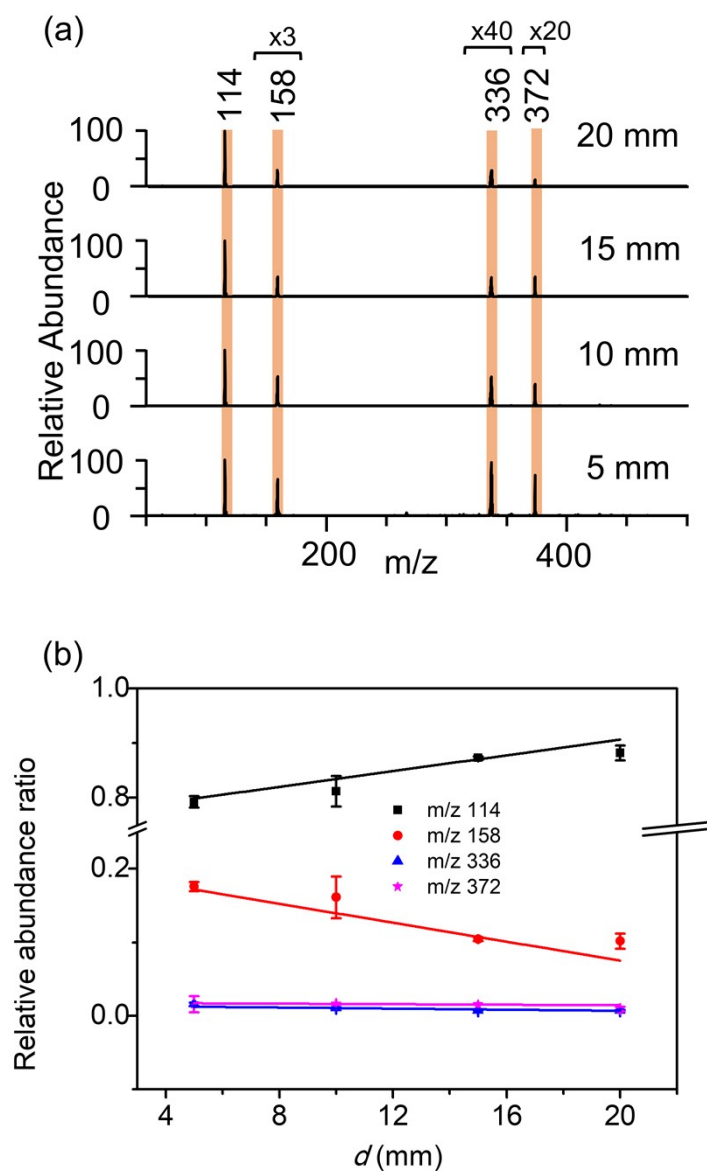

**Figure S3 Fmoc elimination reaction in microdroplets of  $P_f$  with different distance.** Online mass spectrum (a) and corresponding curves for relative abundance ratio of ions *v.s.* distance between tip of droplets emitter and inlet of droplets collector.

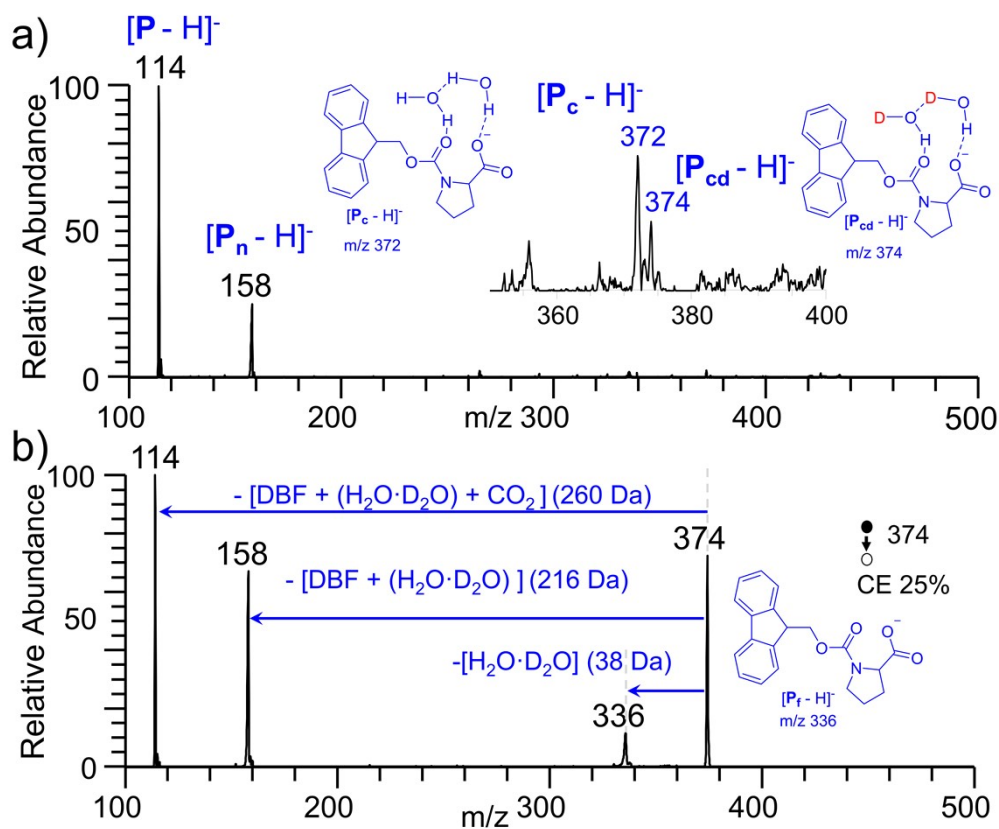

**Figure S4. Mass spectrometric analysis of Fmoc elimination reaction in deuterated microdroplets of  $P_f$ .** Online mass spectrum of Fmoc deprotection reaction of  $P_f$  in deuterated microdroplets (a). MS/MS spectra of ions of  $m/z$  374.



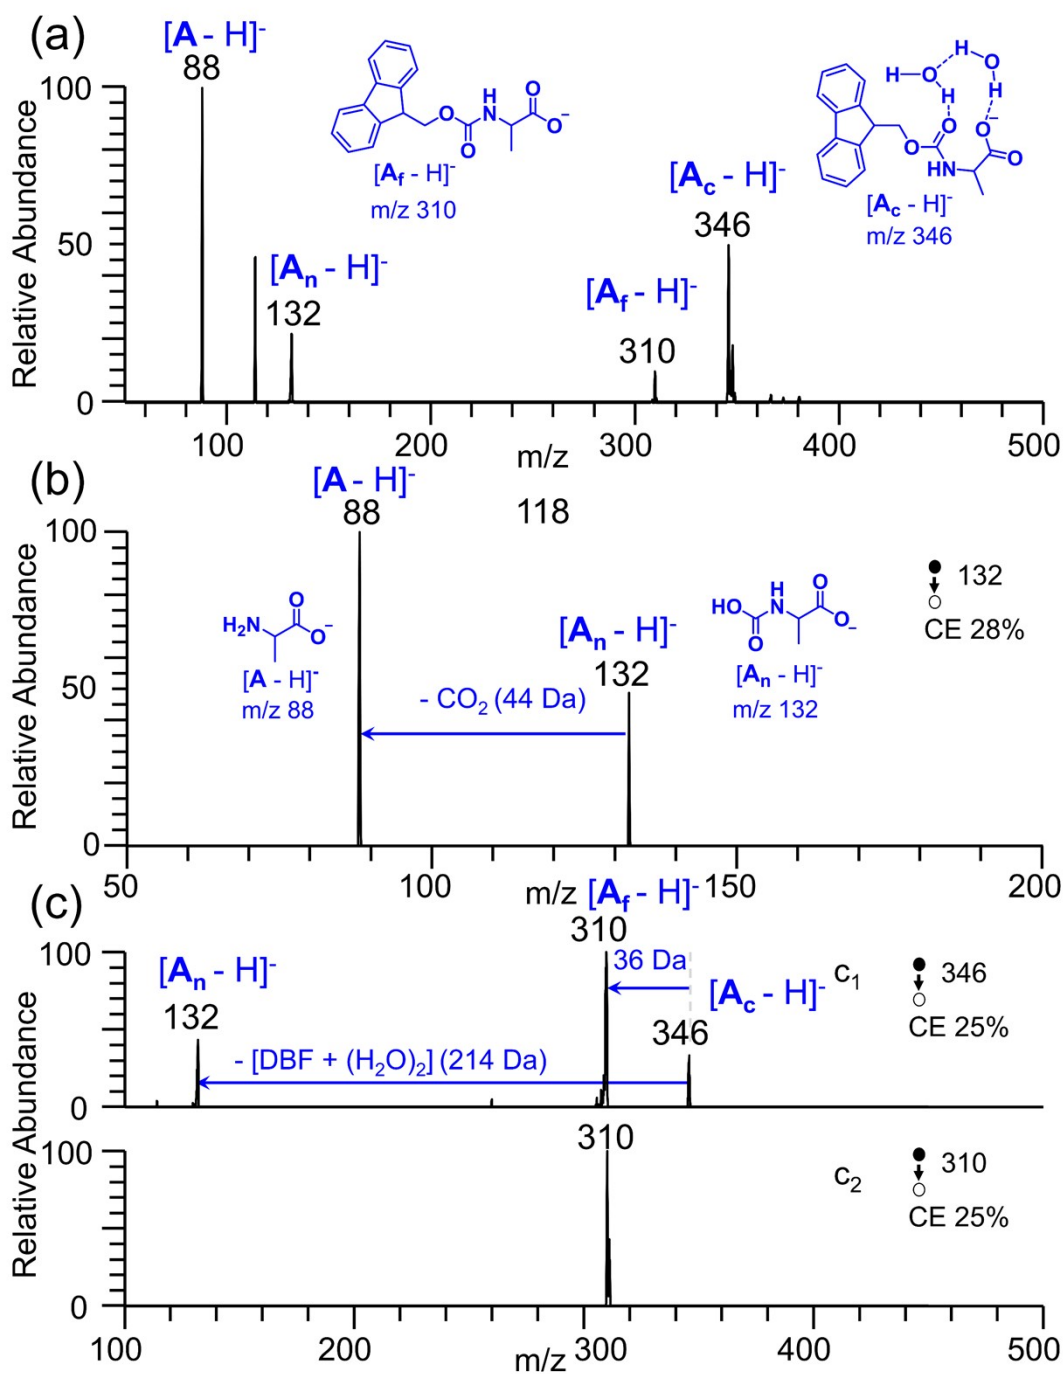

**Figure S5. Mass spectrometric analysis of Fmoc elimination reaction in microdroplets of  $A_f$ .** Online mass spectrum of Fmoc deprotection reaction of  $A_f$  in microdroplets (a). MS/MS spectra of ions of m/z 132 (b), m/z 346 ( $c_1$ ), m/z 310 ( $c_2$ ).

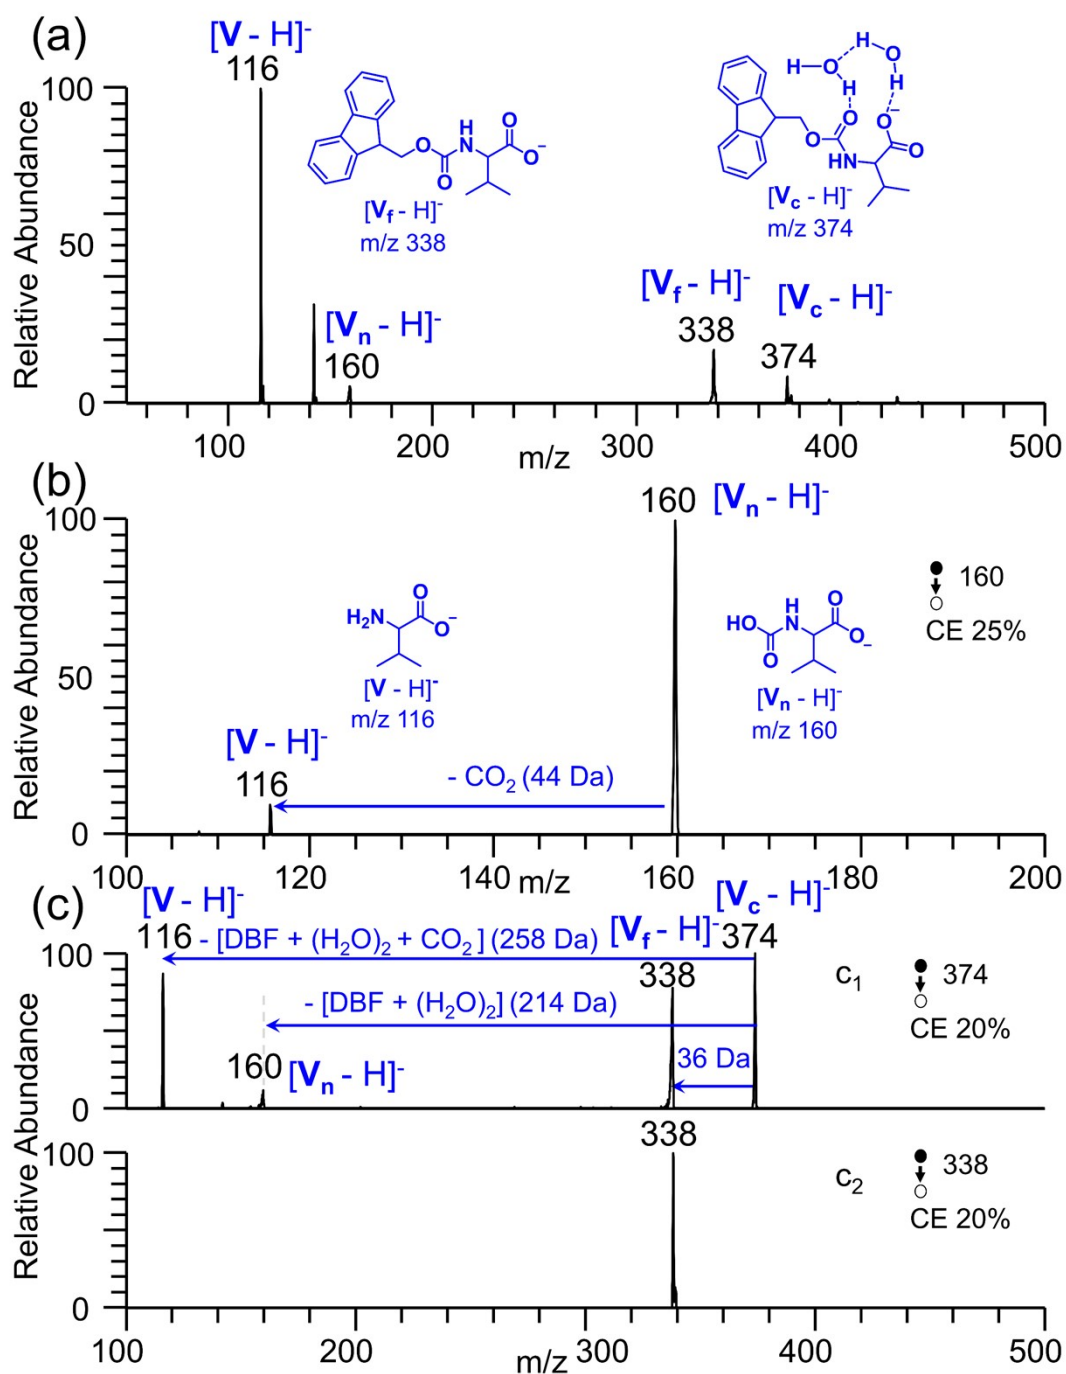

**Figure S6. Mass spectrometric analysis of Fmoc elimination reaction in microdroplets of  $V_f$ .** Online mass spectrum of Fmoc deprotection reaction of  $V_f$  in microdroplets (a). MS/MS spectra of ions of m/z 160 (b), m/z 374 ( $c_1$ ), m/z 338 ( $c_2$ ).

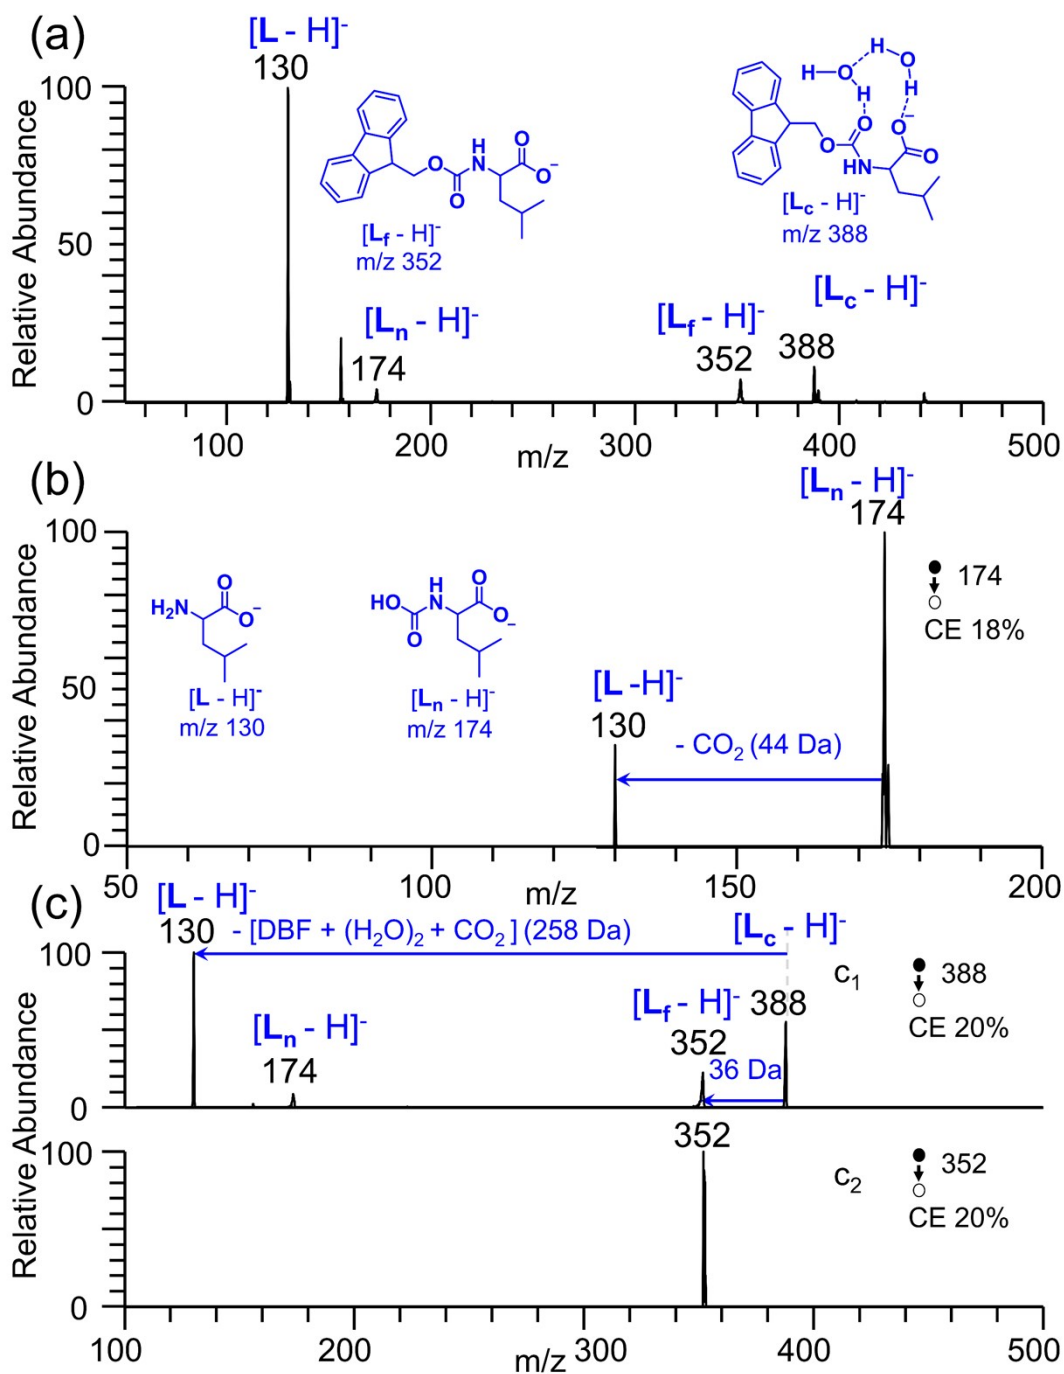

**Figure S7. Mass spectrometric analysis of Fmoc elimination reaction in microdroplets of  $L_f$ .** (a) Online mass spectrum of Fmoc deprotection reaction of  $L_f$  in microdroplets. MS/MS spectra of ions of m/z 174 (b), m/z 388 ( $c_1$ ), m/z 352 ( $c_2$ ).

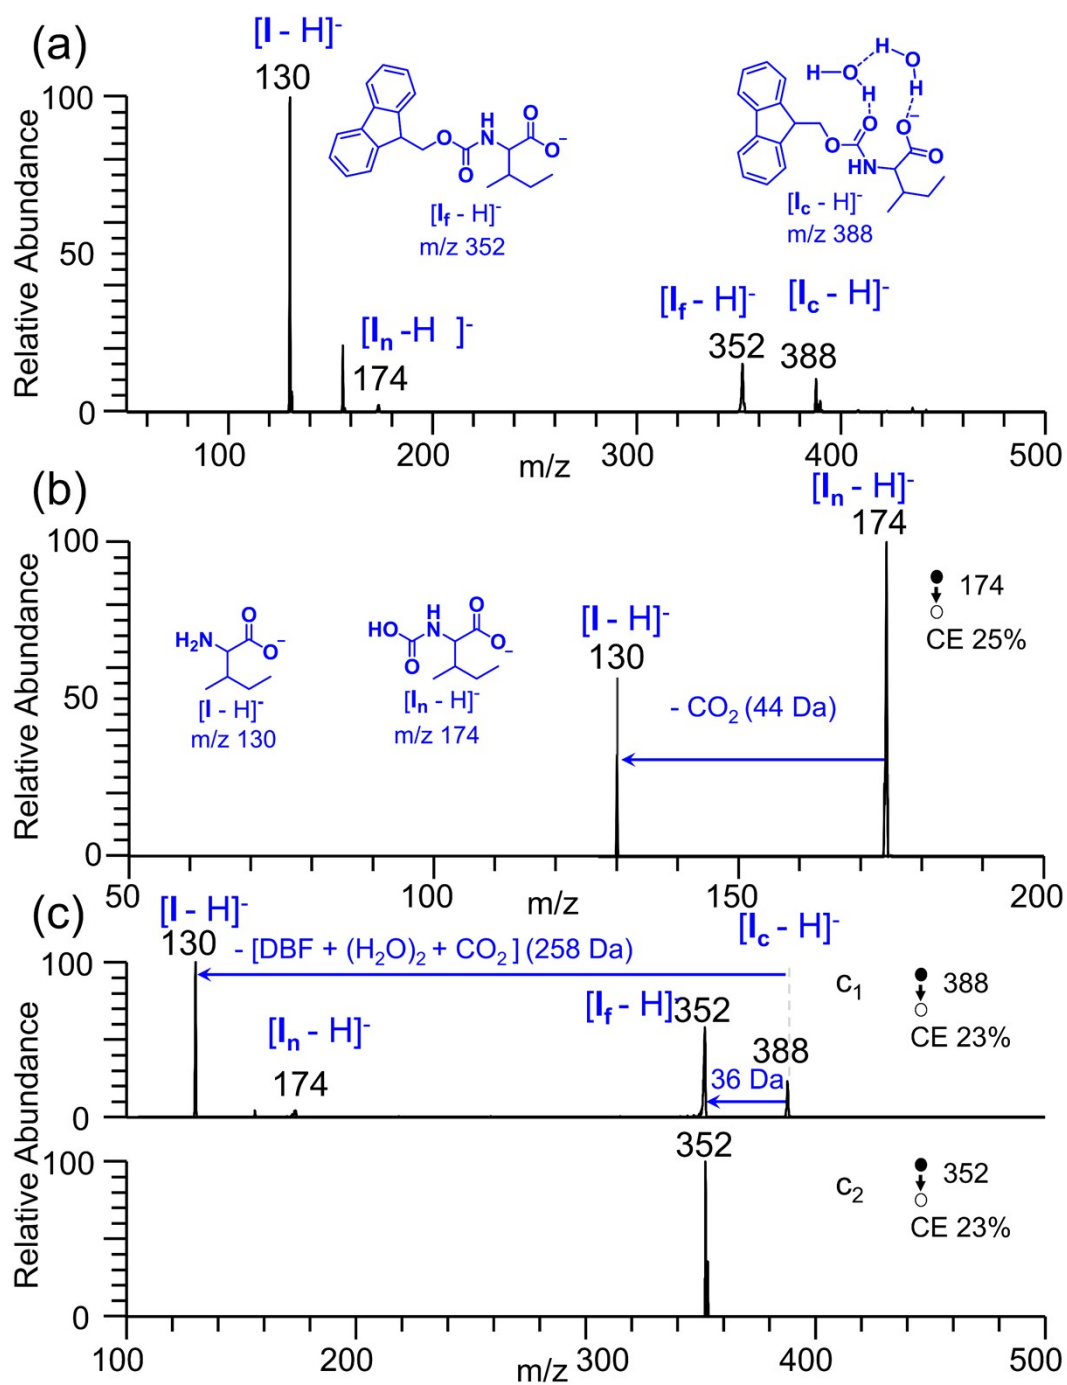

**Figure S8. Mass spectrometric analysis of Fmoc elimination reaction in microdroplets of  $I_f$ .** (a) Online mass spectrum of Fmoc deprotection reaction of  $I_f$  in microdroplets. MS/MS spectra of ions of m/z 174 (b), m/z 388 ( $c_1$ ), m/z 352 ( $c_2$ ).

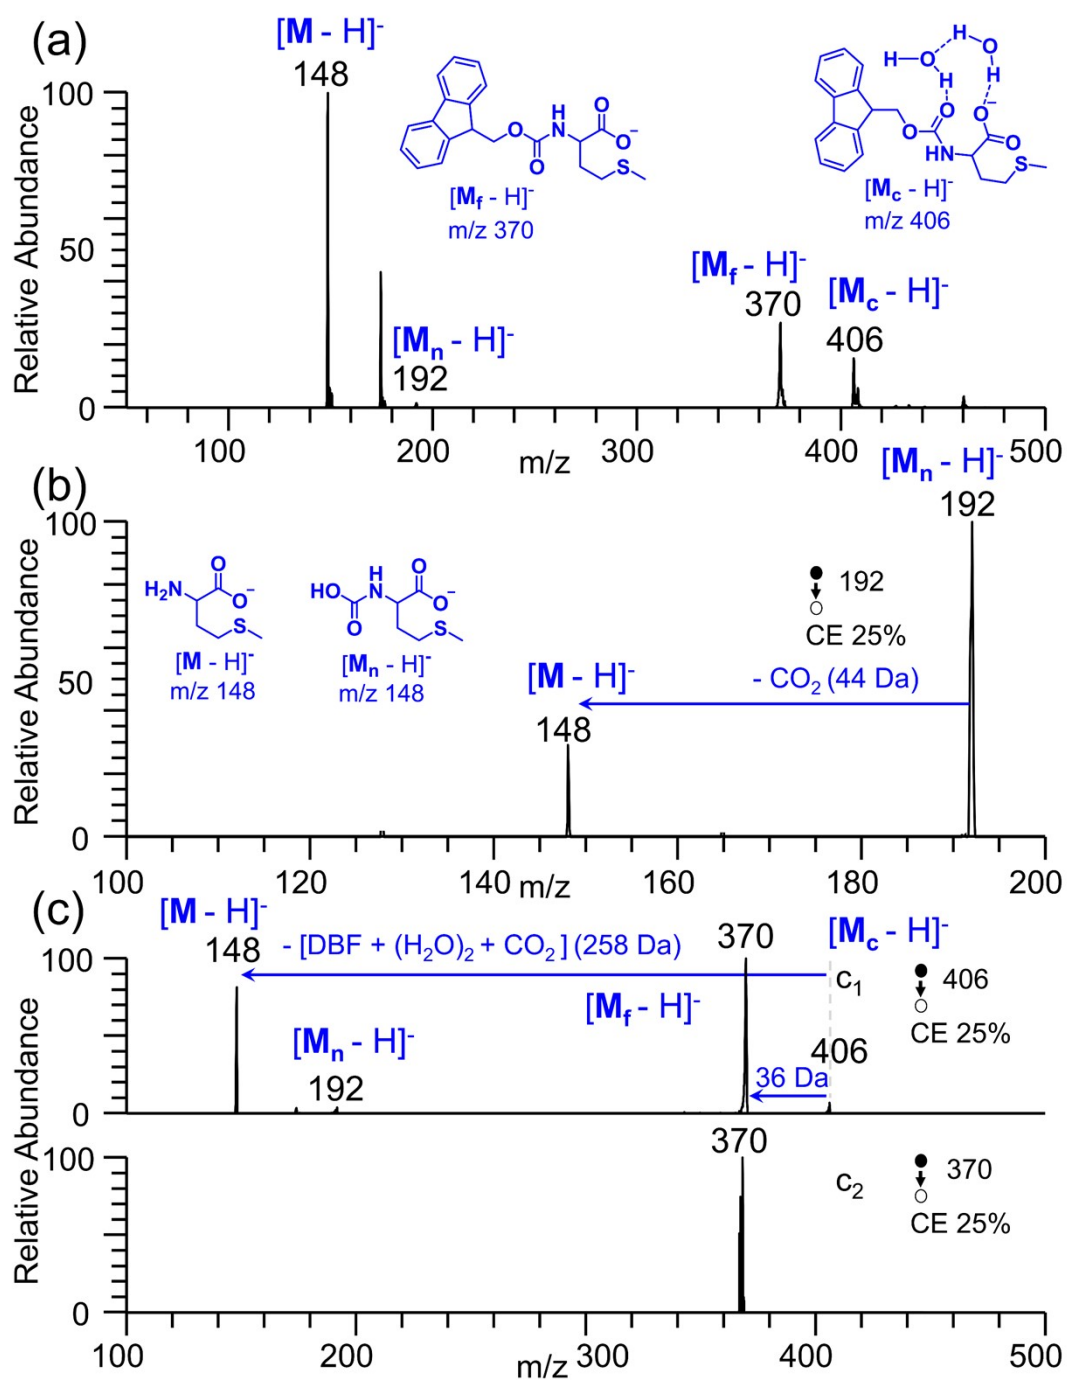

**Figure S9. Mass spectrometric analysis of Fmoc elimination reaction in microdroplets of  $M_f$ .** (a) Online mass spectrum of Fmoc deprotection reaction of  $M_f$  in microdroplets. MS/MS spectra of ions of m/z 192 (b), m/z 406 ( $c_1$ ), m/z 370 ( $c_2$ ).

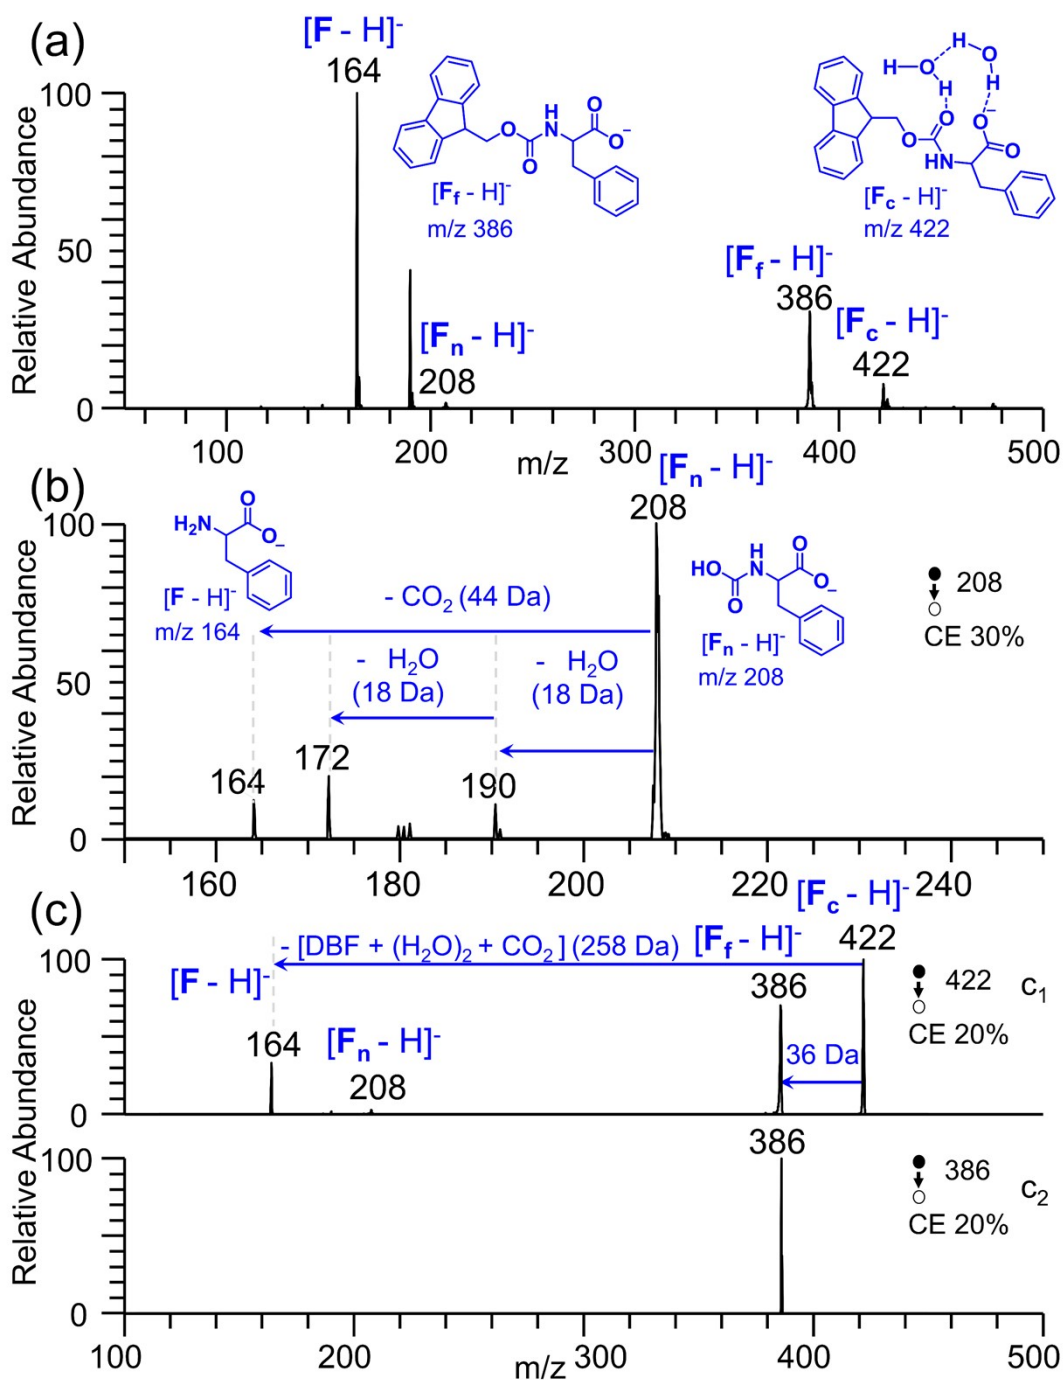

**Figure S10. Mass spectrometric analysis of Fmoc elimination reaction in microdroplets of  $F_f$ .** (a) Online mass spectrum of Fmoc deprotection reaction of  $F_f$  in microdroplets. MS/MS spectra of ions of m/z 208 (b), m/z 422 ( $c_1$ ), m/z 386 ( $c_2$ ).

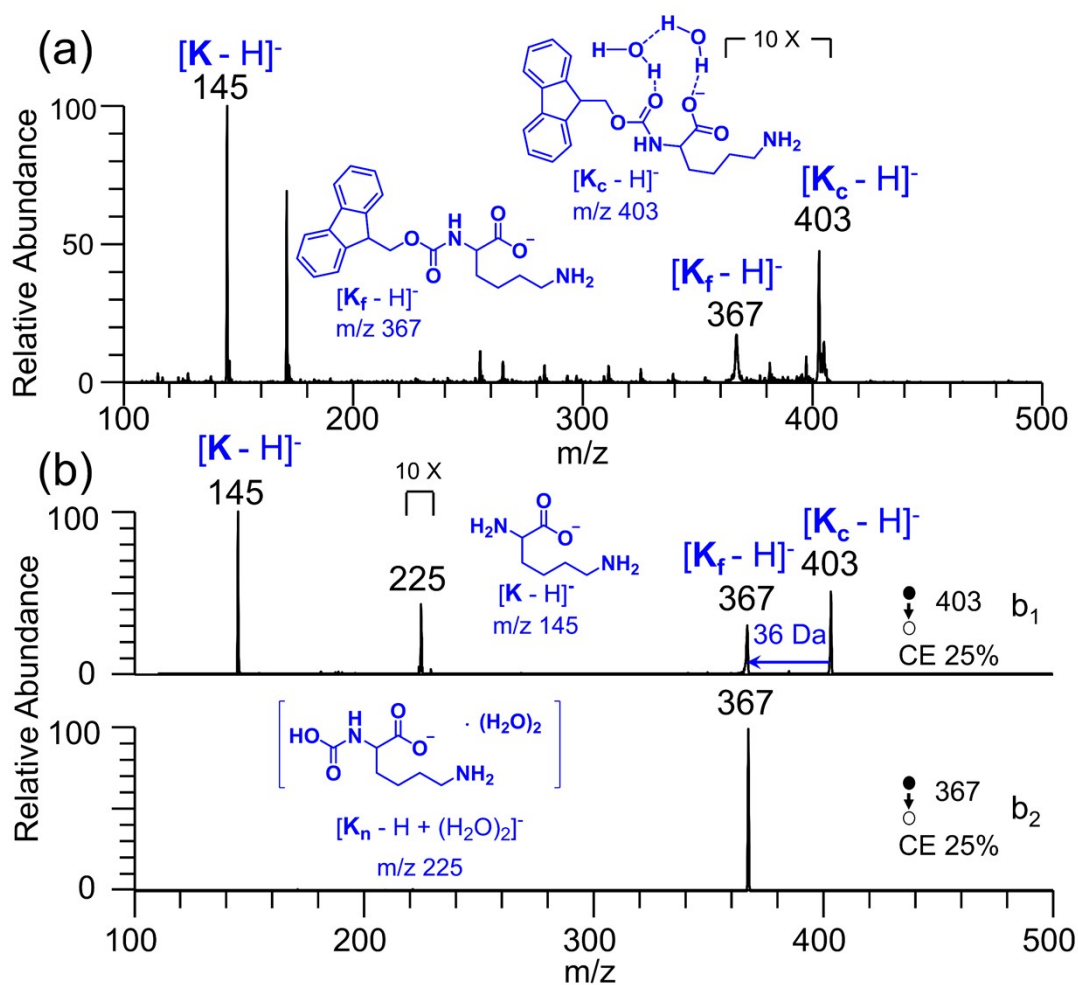

**Figure S11. Mass spectrometric analysis of Fmoc elimination reaction in microdroplets of  $K_f$ .** (a) Online mass spectrum of Fmoc deprotection reaction of  $K_f$  in microdroplets. MS/MS spectra of ions of m/z 403 ( $b_1$ ), m/z 367 ( $b_2$ ).

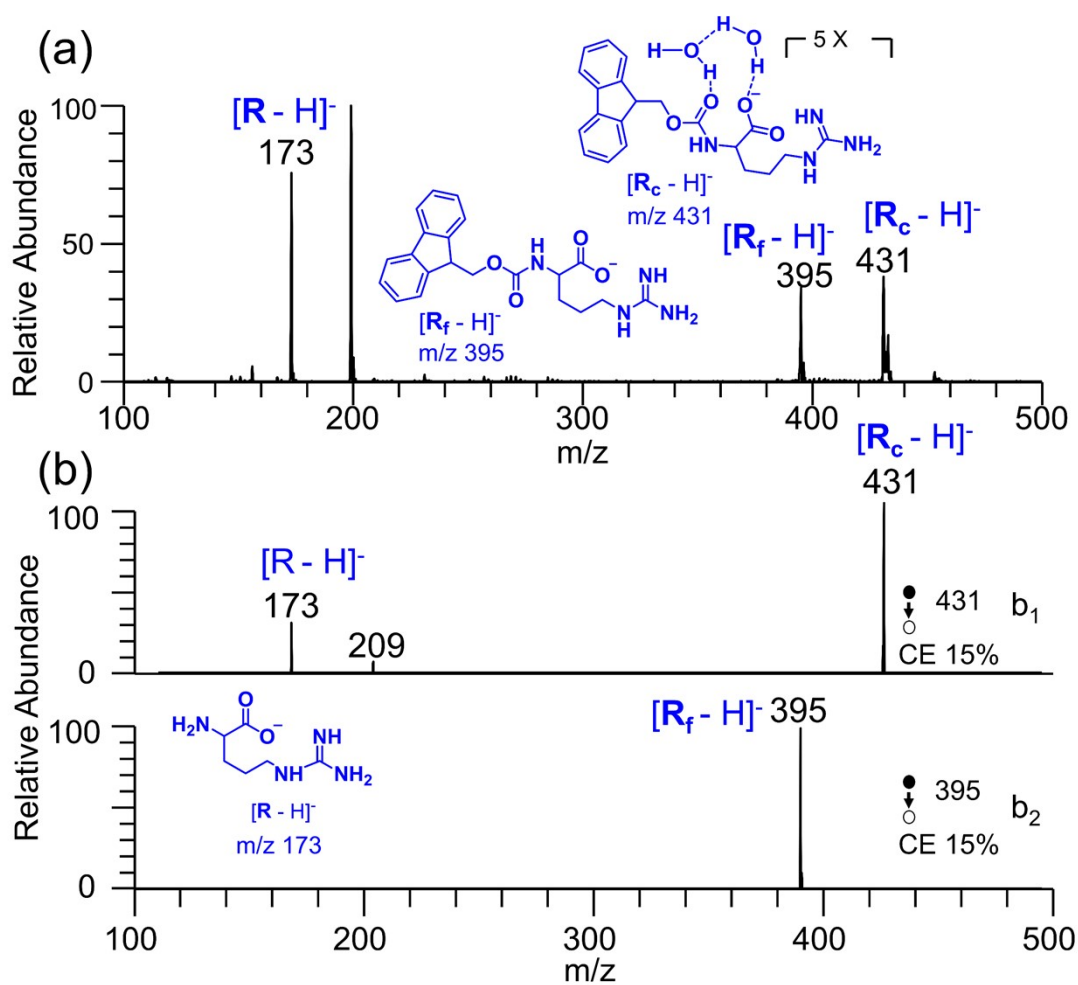

**Figure S12. Mass spectrometric analysis of Fmoc elimination reaction in microdroplets of  $R_f$ .** (a) Online mass spectrum of Fmoc deprotection reaction of  $R_f$  in microdroplets. MS/MS spectra of ions of m/z 431 (b<sub>1</sub>), m/z 395 (b<sub>2</sub>).



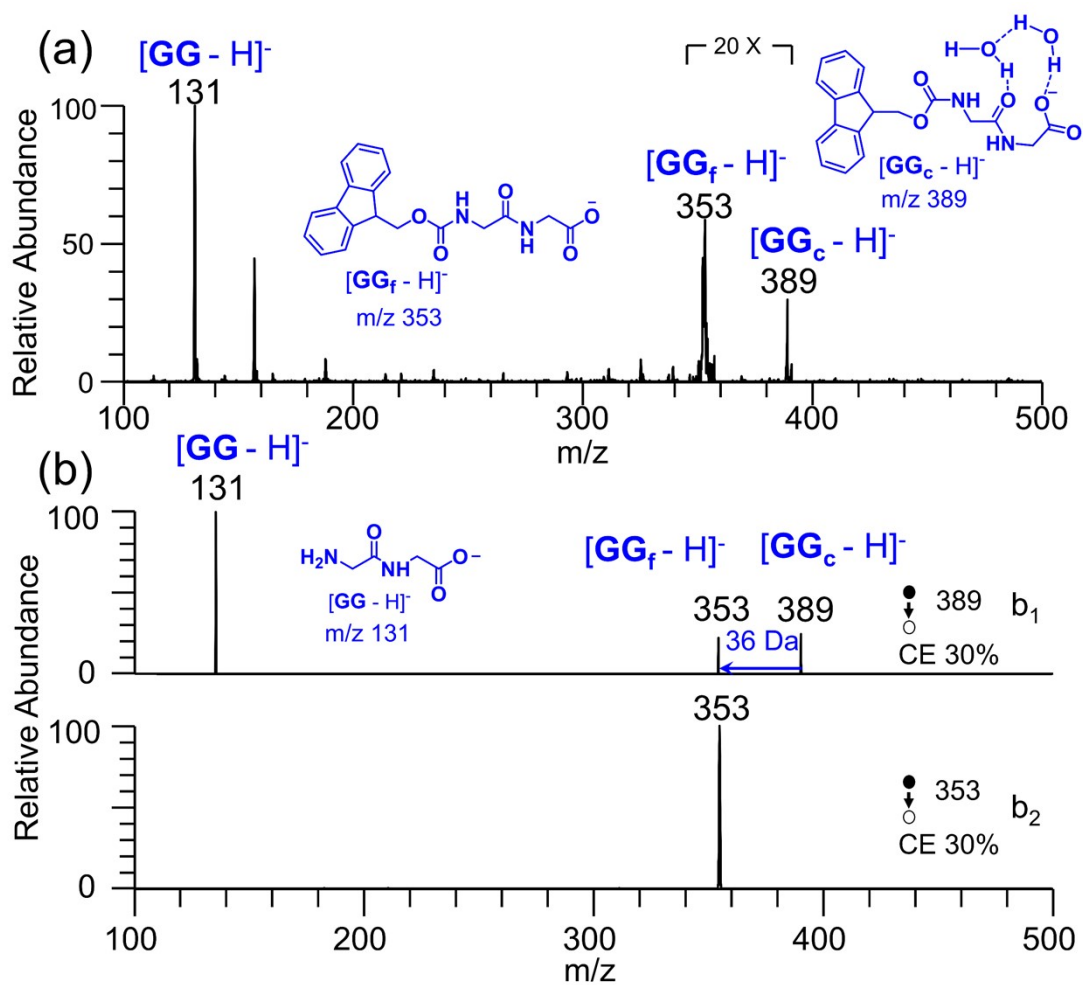

**Figure S13. Mass spectrometric analysis of Fmoc elimination reaction in microdroplets of  $\text{GG}_f$ .** (a) Online mass spectrum of Fmoc deprotection reaction of  $\text{GG}_f$  in microdroplets. MS/MS spectra of ions of m/z 389 ( $b_1$ ), m/z 353 ( $b_2$ ).

Table S1 Relative proportion of  $[\mathbf{X}_f - \text{H}]^-$  and  $[\mathbf{X}_c - \text{H}]^-$  after microdroplet reaction recorded by mass spectrometer, comparing with base peaks in the mass spectra

| Reactant              | $[\mathbf{X}_f - \text{H}]^-$<br>m/z (%) | $[\mathbf{X}_c - \text{H}]^-$<br>m/z (%) |
|-----------------------|------------------------------------------|------------------------------------------|
| <b>G<sub>f</sub></b>  | 296 (28)                                 | 332 (84)                                 |
| <b>A<sub>f</sub></b>  | 310 (10)                                 | 346 (48)                                 |
| <b>P<sub>f</sub></b>  | 336 (2)                                  | 372 (19)                                 |
| <b>V<sub>f</sub></b>  | 338 (17)                                 | 374 (9)                                  |
| <b>L<sub>f</sub></b>  | 352 (14)                                 | 388 (11)                                 |
| <b>I<sub>f</sub></b>  | 352 (15)                                 | 388 (10)                                 |
| <b>K<sub>f</sub></b>  | 367 (1.8)                                | 403 (5)                                  |
| <b>M<sub>f</sub></b>  | 370 (27)                                 | 406 (17)                                 |
| <b>F<sub>f</sub></b>  | 386 (31)                                 | 422 (8)                                  |
| <b>R<sub>f</sub></b>  | 395 (5)                                  | 431 (8)                                  |
| <b>GG<sub>f</sub></b> | 353 (3)                                  | 389 (1.5)                                |

As for protected lysine (**K<sub>f</sub>**), Arginine (**R<sub>f</sub>**) and dipeptide (**GG<sub>f</sub>**), their relative proportions of  $[\mathbf{X}_f - \text{H}]^-$  are  $\leq 5\%$ , suggesting that, in microdroplets,  $[\mathbf{K}_f - \text{H}]^-$ ,  $[\mathbf{R}_f - \text{H}]^-$  and  $[\mathbf{GG}_f - \text{H}]^-$  are more likely to undergo fragmentation and release Fmoc group. As we know, the fragmentation of the protected amino acid highly depends on the release of the lone hydrogen at the ninth carbon of the fluorene ring. It was rationalized that the extra nitrogen atoms in **K<sub>f</sub>**, **R<sub>f</sub>**, and **GG<sub>f</sub>** may act as acceptors for the lone hydrogen at the ninth carbon and promote the release of Fmoc group. The relative low proportion of  $[\mathbf{P}_f - \text{H}]^-$  may owe to the property of secondary amine (proline is a secondary amine and the basicity of a secondary amine commonly higher than that of a primary amine).  $[\mathbf{X}_c - \text{H}]^-$  are ions derived from the combination of  $[\mathbf{X}_f - \text{H}]^-$  with a water dimer via the hydrogen bond. The relative proportions of  $[\mathbf{G}_c - \text{H}]^-$  and  $[\mathbf{A}_c - \text{H}]^-$  are 84% and 48%, respectively. However, the relative proportions of other compounds are much lower than that of  $[\mathbf{G}_c - \text{H}]^-$  and  $[\mathbf{A}_c - \text{H}]^-$ , it may due to their large substitutes on the side chain which may hinder the water dimer binding to the

two carboxyl groups of [ $\mathbf{X}_c - \text{H}$ ]. The relative low proportion of [ $\mathbf{GG}_c - \text{H}$ ] $^-$  may due to the intramolecular hydrogen bonding of [ $\mathbf{GG}_f - \text{H}$ ] $^-$ , which may occupy the binding sites of the water dimer.

**Cartesian coordinates (in angstrom), calculated gas-phase Gibbs free energies and gas-phase enthalpies of all intermediates and transition states.**

**P<sub>f</sub>**

$\Delta G_{\text{gas}} = -1126.398682$  a.u.

$\Delta H_{\text{gas}} = -1126.329051$  a.u.

---

|    |   |              |              |              |
|----|---|--------------|--------------|--------------|
| 1  | C | 0.000000337  | 0.000001058  | -0.000000679 |
| 2  | C | -0.000001228 | 0.000001104  | 0.000000370  |
| 3  | C | 0.000002314  | -0.000001727 | -0.000000674 |
| 4  | C | -0.000001607 | 0.000001380  | 0.000000925  |
| 5  | C | 0.000000044  | 0.000000203  | -0.000000270 |
| 6  | C | 0.000000072  | -0.000001638 | -0.000000366 |
| 7  | H | 0.000000387  | -0.000000672 | -0.000000889 |
| 8  | H | -0.000000360 | -0.000000854 | -0.000000742 |
| 9  | H | -0.000001833 | 0.000000282  | -0.000000136 |
| 10 | H | 0.000000373  | -0.000000052 | -0.000000711 |
| 11 | C | 0.000004667  | -0.000001266 | -0.000004153 |
| 12 | H | -0.000004386 | 0.000001538  | 0.000000861  |
| 13 | C | -0.000001925 | -0.000000598 | 0.000000440  |
| 14 | C | 0.000000038  | -0.000002415 | -0.000001192 |
| 15 | C | 0.000000654  | -0.000000263 | -0.000000405 |
| 16 | C | -0.000000054 | -0.000000429 | -0.000000060 |
| 17 | C | -0.000000257 | -0.000000215 | -0.000000862 |
| 18 | C | 0.000000592  | -0.000000855 | -0.000000468 |
| 19 | H | -0.000000497 | 0.000000150  | 0.000000760  |
| 20 | H | -0.000000224 | 0.000000438  | 0.000000199  |
| 21 | H | 0.000000640  | 0.000000208  | 0.000000002  |
| 22 | H | 0.000000747  | -0.000000341 | -0.000000517 |
| 23 | C | -0.000004789 | -0.000004042 | -0.000001937 |
| 24 | H | -0.000001089 | 0.000003430  | 0.000000190  |
| 25 | H | -0.000000350 | -0.000000545 | 0.000000324  |
| 26 | O | -0.000003168 | -0.000003933 | -0.000001671 |
| 27 | C | 0.000006847  | 0.000016749  | 0.000001507  |
| 28 | O | -0.000001960 | -0.000003456 | 0.000002905  |
| 29 | C | 0.000007891  | -0.000008735 | -0.000004653 |
| 30 | C | 0.000003202  | 0.000000152  | -0.000002131 |
| 31 | C | -0.000000279 | 0.000006263  | 0.000009142  |
| 32 | H | 0.000001370  | -0.000000529 | -0.000000201 |
| 33 | C | -0.000006315 | -0.000001796 | -0.000006710 |
| 34 | H | 0.000000247  | -0.000000195 | 0.000003110  |
| 35 | H | -0.000001123 | -0.000005296 | -0.000001901 |
| 36 | H | -0.000005212 | -0.000000090 | 0.000008083  |
| 37 | H | 0.000002539  | -0.000002081 | 0.000000373  |

|    |   |              |              |              |
|----|---|--------------|--------------|--------------|
| 38 | H | 0.000001425  | 0.000005633  | -0.000007210 |
| 39 | H | -0.000001411 | 0.000001168  | 0.000005334  |
| 40 | N | 0.000002404  | 0.000005004  | -0.000004031 |
| 41 | C | -0.000003401 | 0.000007383  | -0.000003448 |
| 42 | O | 0.000001348  | -0.000001936 | 0.000006330  |
| 43 | O | 0.000003329  | -0.000008183 | 0.000005164  |

H<sub>2</sub>O

$$\Delta G_{\text{gas}} = -76.273322 \text{ a.u.}$$

$$\Delta H_{\text{gas}} = -76.251236 \text{ a.u.}$$

|   |   |              |              |              |
|---|---|--------------|--------------|--------------|
| 1 | H | -0.000022055 | -0.000007943 | 0.000018427  |
| 2 | H | 0.000005915  | -0.000029035 | 0.000002866  |
| 3 | O | 0.000016140  | 0.000036978  | -0.000021293 |

P<sub>c</sub>

$$\Delta G_{\text{gas}} = -1278.971124 \text{ a.u.}$$

$$\Delta H_{\text{gas}} = -1278.888587 \text{ a.u.}$$

|    |   |              |              |              |
|----|---|--------------|--------------|--------------|
| 1  | C | 0.000000083  | 0.000001085  | -0.000000065 |
| 2  | C | -0.000000245 | 0.000000016  | -0.000000357 |
| 3  | C | 0.000000179  | -0.000001137 | -0.000001190 |
| 4  | C | -0.000004863 | 0.000001689  | 0.000002231  |
| 5  | C | 0.000000556  | 0.000001801  | -0.000000864 |
| 6  | C | 0.000000204  | 0.000000111  | -0.000000450 |
| 7  | H | -0.000000444 | 0.000001145  | -0.000000722 |
| 8  | H | -0.000001023 | 0.000000671  | -0.000000852 |
| 9  | H | -0.000000367 | 0.000000873  | -0.000000423 |
| 10 | H | 0.000000002  | 0.000000742  | -0.000000151 |
| 11 | C | 0.000009888  | -0.000003738 | -0.000011289 |
| 12 | H | -0.000003600 | 0.000002785  | 0.000003251  |
| 13 | C | -0.000001775 | 0.000006637  | 0.000002567  |
| 14 | C | 0.000001996  | -0.000005014 | -0.000000779 |
| 15 | C | -0.000002008 | 0.000001998  | 0.000000374  |
| 16 | C | 0.000002252  | 0.000002896  | 0.000001103  |
| 17 | C | 0.000000059  | -0.000002702 | 0.000000557  |
| 18 | C | 0.000000383  | -0.000000491 | -0.000001590 |
| 19 | H | 0.000000964  | 0.000001047  | 0.000000961  |
| 20 | H | 0.000001221  | -0.000000040 | 0.000000429  |
| 21 | H | 0.000000651  | 0.000000359  | -0.000000116 |
| 22 | C | 0.000000549  | 0.000001012  | 0.000000266  |
| 23 | C | -0.000010246 | 0.000020634  | 0.000012479  |

|    |   |              |              |              |
|----|---|--------------|--------------|--------------|
| 24 | H | 0.000002225  | -0.000002673 | -0.000001746 |
| 25 | H | 0.000001770  | -0.000002723 | 0.000000643  |
| 26 | O | 0.000005369  | -0.000022164 | -0.000015090 |
| 27 | C | 0.000013523  | 0.000014839  | 0.000002695  |
| 28 | O | -0.000002518 | -0.000005438 | 0.000002298  |
| 29 | C | 0.000011665  | -0.000002831 | 0.000000837  |
| 30 | C | -0.000001376 | -0.000004622 | 0.000000521  |
| 31 | C | -0.000005400 | 0.000002562  | -0.000001398 |
| 32 | H | -0.000000843 | -0.000001689 | -0.000001189 |
| 33 | C | 0.000002229  | 0.000002504  | 0.000001041  |
| 34 | H | -0.000000650 | -0.000000582 | 0.000000495  |
| 35 | H | -0.000000631 | 0.000000624  | -0.000000044 |
| 36 | H | 0.000002278  | -0.000001395 | 0.000000931  |
| 37 | H | 0.000001255  | -0.000001028 | 0.000000116  |
| 38 | H | 0.000000423  | -0.000001827 | 0.000000864  |
| 39 | H | 0.000000800  | -0.000000992 | 0.000000796  |
| 40 | N | -0.000015138 | -0.000001559 | 0.000006662  |
| 41 | C | -0.000021952 | -0.000017144 | 0.000003226  |
| 42 | O | 0.000009270  | 0.000023561  | -0.000032710 |
| 43 | O | 0.000006484  | -0.000000937 | 0.000002797  |
| 44 | O | -0.000004719 | -0.000000355 | -0.000000670 |
| 45 | H | 0.000005729  | -0.000011165 | -0.000000879 |
| 46 | H | 0.000000499  | -0.000000743 | 0.000001180  |
| 47 | O | 0.000021822  | 0.000026530  | -0.000007121 |
| 48 | H | -0.000018006 | -0.000006150 | -0.000002009 |
| 49 | H | -0.000008522 | -0.000016980 | 0.000032384  |

-----

**TS1 (315.45  $\text{icm}^{-1}$ )**

$\Delta G_{\text{gas}} = -1126.370974 \text{ a.u.}$

$\Delta H_{\text{gas}} = -1126.301022 \text{ a.u.}$

-----

|    |   |              |              |              |
|----|---|--------------|--------------|--------------|
| 1  | C | -0.000000117 | -0.000000586 | -0.000000886 |
| 2  | C | -0.000000220 | -0.000000331 | -0.000000980 |
| 3  | C | -0.000000259 | -0.000000196 | -0.000000709 |
| 4  | C | 0.000000047  | -0.000000295 | -0.000000570 |
| 5  | C | 0.000000002  | -0.000000406 | -0.000000356 |
| 6  | C | -0.000000003 | -0.000000541 | -0.000000555 |
| 7  | H | -0.000000114 | -0.000000694 | -0.000001054 |
| 8  | H | -0.000000298 | -0.000000378 | -0.000001267 |
| 9  | H | -0.000000265 | -0.000000021 | -0.000000857 |
| 10 | H | 0.000000112  | -0.000000640 | -0.000000438 |
| 11 | C | -0.000000098 | -0.000000716 | 0.000000041  |
| 12 | H | 0.000000074  | 0.000001590  | -0.000000685 |

|    |   |              |              |              |
|----|---|--------------|--------------|--------------|
| 13 | C | -0.000000128 | -0.000000374 | 0.000000383  |
| 14 | C | 0.000000233  | -0.000000092 | 0.000000496  |
| 15 | C | 0.000000219  | 0.000000043  | 0.000000702  |
| 16 | C | 0.000000213  | -0.000000200 | 0.000000590  |
| 17 | C | 0.000000224  | -0.000000413 | 0.000000270  |
| 18 | C | 0.000000105  | -0.000000262 | -0.000000014 |
| 19 | H | 0.000000178  | 0.000000396  | 0.000000581  |
| 20 | H | 0.000000339  | 0.000000042  | 0.000000972  |
| 21 | H | 0.000000404  | -0.000000303 | 0.000000799  |
| 22 | H | 0.000000317  | -0.000000514 | 0.000000220  |
| 23 | C | 0.000000058  | 0.000000643  | 0.000000007  |
| 24 | H | -0.000000230 | 0.000000502  | 0.000000042  |
| 25 | H | -0.000000280 | 0.000000585  | -0.000000510 |
| 26 | O | 0.000000047  | -0.000000726 | -0.000000471 |
| 27 | C | -0.000000164 | 0.000000151  | -0.000001517 |
| 28 | O | 0.000001292  | -0.000000841 | 0.000001670  |
| 29 | C | 0.000000684  | -0.000000365 | 0.000003794  |
| 30 | C | -0.000001168 | 0.000003061  | -0.000003490 |
| 31 | C | -0.000001465 | 0.000005445  | -0.000001726 |
| 32 | H | 0.000000269  | -0.000000720 | 0.000000382  |
| 33 | C | -0.000002298 | -0.000005166 | 0.000001459  |
| 34 | H | 0.000001233  | 0.000001969  | 0.000000414  |
| 35 | H | -0.000001287 | 0.000000763  | 0.000000271  |
| 36 | H | 0.000000648  | 0.000000716  | 0.000000464  |
| 37 | H | 0.000000145  | 0.000000032  | -0.000000437 |
| 38 | H | 0.000000164  | -0.000000680 | -0.000000407 |
| 39 | H | 0.000000196  | -0.000000384 | 0.000001621  |
| 40 | N | 0.000001563  | -0.000001102 | -0.000001452 |
| 41 | C | 0.000000182  | 0.000001028  | 0.000002010  |
| 42 | O | -0.000001219 | 0.000000009  | 0.000000405  |
| 43 | O | 0.000000665  | -0.000000028 | 0.000000791  |

-----

**TS2 (544.60  $\text{icm}^{-1}$ )**

$\Delta G_{\text{gas}} = -1278.954270$  a.u.

$\Delta H_{\text{gas}} = -1278.876798$  a.u.

|   |   |              |              |              |
|---|---|--------------|--------------|--------------|
| 1 | C | 0.000000430  | -0.000000380 | 0.000000446  |
| 2 | C | -0.000000892 | 0.000000442  | 0.000000528  |
| 3 | C | -0.000001070 | -0.000000379 | -0.000000864 |
| 4 | C | 0.000000352  | 0.000005348  | -0.000001081 |
| 5 | C | 0.000002235  | 0.000000345  | -0.000000956 |
| 6 | C | 0.000000034  | 0.000000618  | 0.000001362  |
| 7 | H | 0.000000148  | -0.000000171 | 0.000000733  |

|    |   |              |              |              |
|----|---|--------------|--------------|--------------|
| 8  | H | 0.000000169  | -0.000000174 | 0.000000360  |
| 9  | H | 0.000000138  | 0.000000051  | 0.000000034  |
| 10 | H | 0.000000075  | -0.000000188 | 0.000000741  |
| 11 | C | 0.000010076  | 0.000044536  | -0.000015595 |
| 12 | H | -0.000050242 | -0.000112032 | 0.000056155  |
| 13 | C | -0.000004321 | 0.000001085  | -0.000006095 |
| 14 | C | -0.000013861 | -0.000000585 | -0.000022055 |
| 15 | C | 0.000000453  | -0.000001591 | -0.000001587 |
| 16 | C | -0.000001245 | -0.000001480 | 0.000002149  |
| 17 | C | -0.000002331 | 0.000002534  | 0.000000502  |
| 18 | C | 0.000002539  | -0.000001534 | 0.000003013  |
| 19 | H | -0.000003835 | 0.000001140  | -0.000008334 |
| 20 | H | -0.000000092 | -0.000000013 | -0.000000167 |
| 21 | H | -0.000000463 | -0.000000023 | 0.000000152  |
| 22 | H | -0.000000188 | -0.000000059 | 0.000000711  |
| 23 | C | -0.000004412 | 0.000012643  | 0.000001672  |
| 24 | H | 0.000000930  | -0.000001160 | -0.000007150 |
| 25 | H | -0.000001797 | -0.000002743 | 0.000001935  |
| 26 | O | 0.000021018  | -0.000020333 | -0.000006332 |
| 27 | C | -0.000019200 | 0.000006923  | 0.000014665  |
| 28 | O | 0.000008607  | 0.000007491  | -0.000018695 |
| 29 | C | 0.000009118  | -0.000005481 | -0.000000939 |
| 30 | C | -0.000003103 | -0.000002597 | 0.000000676  |
| 31 | C | -0.000003547 | 0.000001366  | -0.000002980 |
| 32 | H | 0.000000579  | 0.000006645  | 0.000003936  |
| 33 | C | -0.000000849 | -0.000002423 | 0.000003816  |
| 34 | H | 0.000000062  | -0.000000893 | -0.000001549 |
| 35 | H | -0.000001497 | -0.000000740 | 0.000001619  |
| 36 | H | 0.000005736  | 0.000002776  | 0.000002541  |
| 37 | H | 0.000000898  | -0.000007971 | 0.000002031  |
| 38 | H | -0.000005106 | 0.000004140  | -0.000001515 |
| 39 | I | 0.000003728  | 0.000000204  | -0.000005129 |
| 40 | N | -0.000014389 | 0.000011035  | 0.000008656  |
| 41 | C | 0.000002682  | 0.000016027  | -0.000002620 |
| 42 | O | -0.000018429 | 0.000016907  | 0.000013963  |
| 43 | O | -0.000001005 | -0.000002913 | -0.000001474 |
| 44 | O | 0.000299390  | -0.000049098 | 0.000177100  |
| 45 | H | -0.000431985 | 0.000231739  | -0.000391922 |
| 46 | H | -0.000002195 | -0.000032458 | 0.000010364  |
| 47 | O | 0.000203859  | -0.000100673 | 0.000189507  |
| 48 | H | 0.000012662  | -0.000032989 | -0.000005252 |
| 49 | H | 0.000000135  | 0.000007087  | 0.000002922  |

---



## Int1

$$\Delta G_{\text{gas}} = -740.604085 \text{ a.u.}$$

$$\Delta H_{\text{gas}} = -740.545244 \text{ a.u.}$$

---

|    |   |              |              |              |
|----|---|--------------|--------------|--------------|
| 1  | C | -0.000001812 | -0.000002820 | 0.000000406  |
| 2  | O | 0.000001872  | 0.000001035  | 0.000000649  |
| 3  | C | 0.000001443  | -0.000005758 | -0.000002298 |
| 4  | C | -0.000004741 | -0.000000237 | -0.000000502 |
| 5  | C | -0.000003266 | -0.000001355 | 0.000000550  |
| 6  | H | -0.000001203 | 0.000002112  | 0.000000686  |
| 7  | C | 0.000009630  | -0.000002070 | -0.000002999 |
| 8  | H | -0.000002902 | -0.000001537 | 0.000001689  |
| 9  | H | -0.000000681 | 0.000001380  | 0.000001339  |
| 10 | H | 0.000000506  | 0.000000569  | -0.000001197 |
| 11 | H | 0.000000219  | 0.000002501  | 0.000000012  |
| 12 | H | 0.000000687  | 0.000000555  | 0.000000694  |
| 13 | H | 0.000000073  | -0.000001090 | -0.000000340 |
| 14 | N | 0.000005216  | 0.000004051  | 0.000000417  |
| 15 | C | 0.000005321  | 0.000014676  | -0.000004111 |
| 16 | O | -0.000000529 | -0.000013882 | 0.000014744  |
| 17 | O | -0.000020477 | 0.000011137  | 0.000007616  |
| 18 | O | -0.000000520 | 0.000001462  | 0.000000804  |
| 19 | H | 0.000000020  | 0.000001068  | 0.000001455  |
| 20 | O | -0.000008507 | -0.000010556 | 0.000003307  |
| 21 | H | 0.000000957  | 0.000001285  | -0.000029734 |
| 22 | H | 0.000003369  | 0.000006092  | 0.000005924  |
| 23 | O | -0.000001442 | 0.000008446  | -0.000000350 |
| 24 | H | 0.000014815  | -0.000018941 | -0.000006953 |
| 25 | H | 0.000001948  | 0.000001876  | 0.000008192  |

---

## P<sub>n</sub>

$$\Delta G_{\text{gas}} = -588.025229 \text{ a.u.}$$

$$\Delta H_{\text{gas}} = -587.977952 \text{ a.u.}$$

---

|   |   |              |              |              |
|---|---|--------------|--------------|--------------|
| 1 | C | -0.000003344 | 0.000010896  | -0.000001669 |
| 2 | O | -0.000001407 | -0.000000422 | 0.000003050  |
| 3 | C | 0.000009259  | -0.000019258 | 0.000037412  |
| 4 | C | -0.000029590 | -0.000046854 | 0.000006458  |
| 5 | C | -0.000013756 | 0.000012874  | -0.000001186 |
| 6 | H | -0.000000150 | 0.000002194  | -0.000002639 |
| 7 | C | 0.000029133  | -0.000021583 | -0.000009564 |
| 8 | H | -0.000005692 | 0.000015448  | -0.000000178 |

|    |   |              |              |              |
|----|---|--------------|--------------|--------------|
| 9  | H | -0.000006836 | -0.000008184 | 0.000001782  |
| 10 | H | -0.000004674 | 0.000004774  | -0.000008536 |
| 11 | H | 0.000001875  | -0.000001098 | 0.000000287  |
| 12 | H | 0.000014011  | 0.000005555  | -0.000007399 |
| 13 | H | 0.000006225  | -0.000002315 | 0.000015572  |
| 14 | N | 0.000027983  | 0.000033237  | -0.000036085 |
| 15 | C | -0.000046449 | 0.000003350  | 0.000018004  |
| 16 | O | 0.000003542  | 0.000011089  | -0.000010521 |
| 17 | O | 0.000013898  | 0.000004325  | -0.000010293 |
| 18 | O | 0.000009402  | -0.000002625 | 0.000006706  |
| 19 | H | -0.000003431 | -0.000001404 | -0.000001202 |

-----

## References

- [1] M. J. Frisch, G. W. Trucks, H. B. Schlegel, G. E. Scuseria, M. A. Robb, J. R. Cheeseman, G. Scalmani, V. Barone, G. A. Petersson, H. Nakatsuji, X. Li, M. Caricato, A. V. Marenich, J. Bloino, B. G. Janesko, R. Gomperts, B. Mennucci, H. P. Hratchian, J. V. Ortiz, A. F. Izmaylov, J. L. Sonnenberg, Williams, F. Ding, F. Lipparini, F. Egidi, J. Goings, B. Peng, A. Petrone, T. Henderson, D. Ranasinghe, V. G. Zakrzewski, J. Gao, N. Rega, G. Zheng, W. Liang, M. Hada, M. Ehara, K. Toyota, R. Fukuda, J. Hasegawa, M. Ishida, T. Nakajima, Y. Honda, O. Kitao, H. Nakai, T. Vreven, K. Throssell, J. A. Montgomery Jr., J. E. Peralta, F. Ogliaro, M. J. Bearpark, J. J. Heyd, E. N. Brothers, K. N. Kudin, V. N. Staroverov, T. A. Keith, R. Kobayashi, J. Normand, K. Raghavachari, A. P. Rendell, J. C. Burant, S. S. Iyengar, J. Tomasi, M. Cossi, J. M. Millam, M. Klene, C. Adamo, R. Cammi, J. W. Ochterski, R. L. Martin, K. Morokuma, O. Farkas, J. B. Foresman, D. J. Fox, Gaussian 16 A.03. Wallingford, CT, **2016**.
- [2] S. Grimme, S. Ehrlich and L. Goerigk, *J. Comput. Chem.*, 2011, **32**, 1456-1465.
- [3] J.-D. Chai and M. Head-Gordon, *Phys. Chem. Chem. Phys.*, 2008, **10**, 6615-6620.
- [4] F. Weigend and R. Ahlrichs, *Phys. Chem. Chem. Phys.*, 2005, **7**, 3297-3305.
- [5] K. Fukui, *Acc. Chem. Res.*, 1981, **14**, 363-368.
- [6] Semichem, Inc., GaussView 6.0.16 program: <http://gaussian.com/gaussview6/> (accessed on Nov 25, 2019).
